# Supplementary material for: Grad‐seq in a Gram‐positive bacterium reveals exonucleolytic sRNA activation in competence control
Source: PubMed Central journal article supplement (PMC7196914; doi:10.15252/embj.2019103852), 2020-03-30

Fig6A

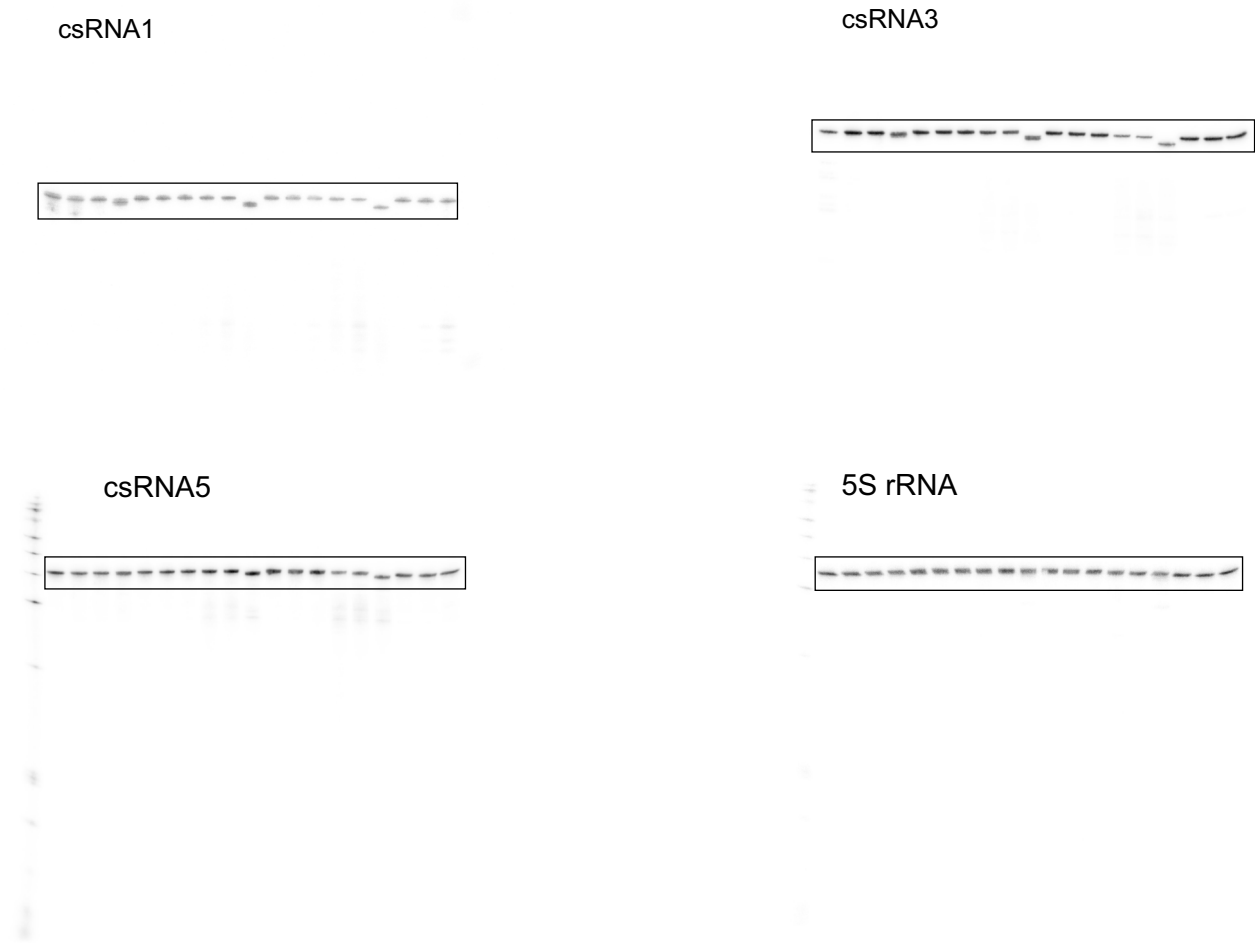

Fig6B

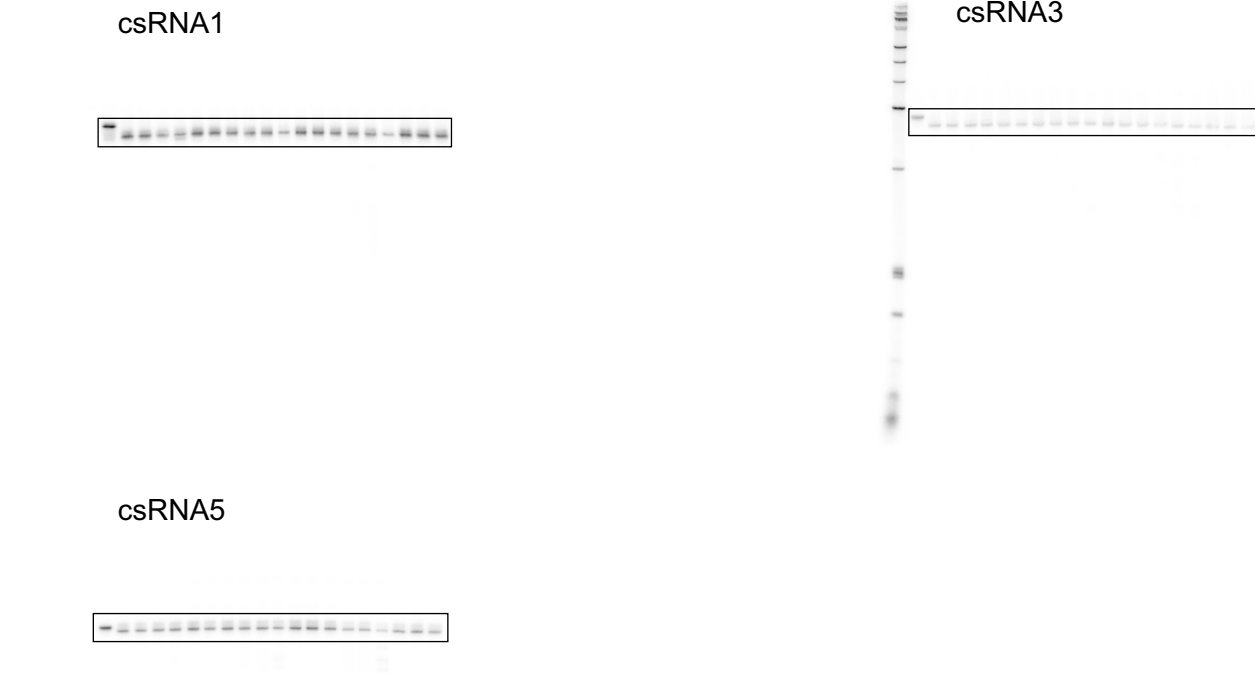

Fig6C

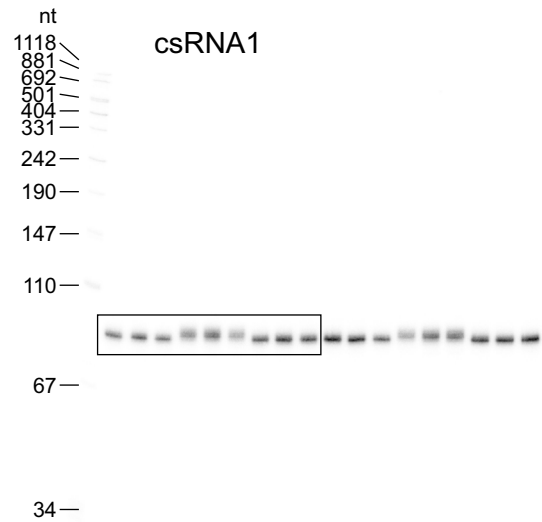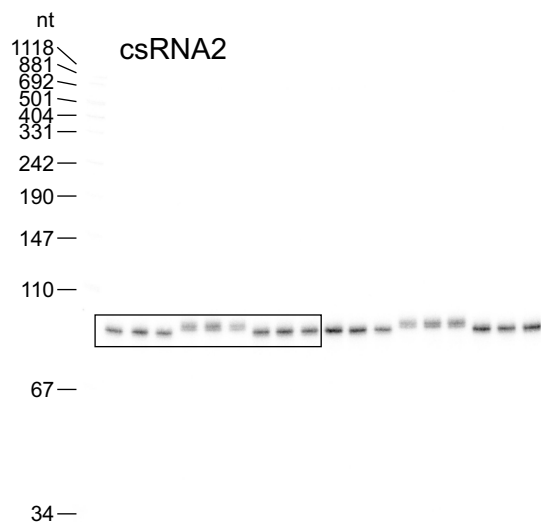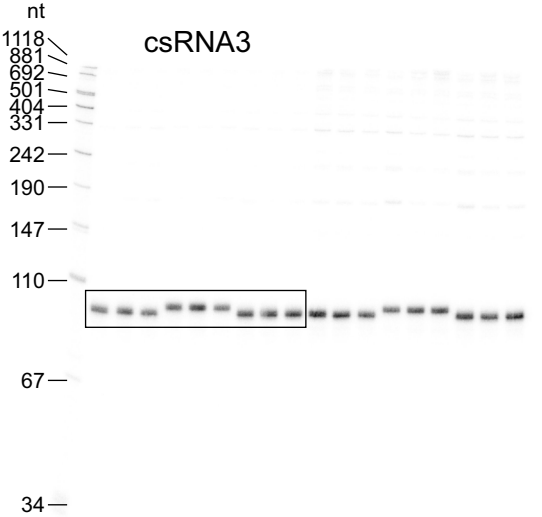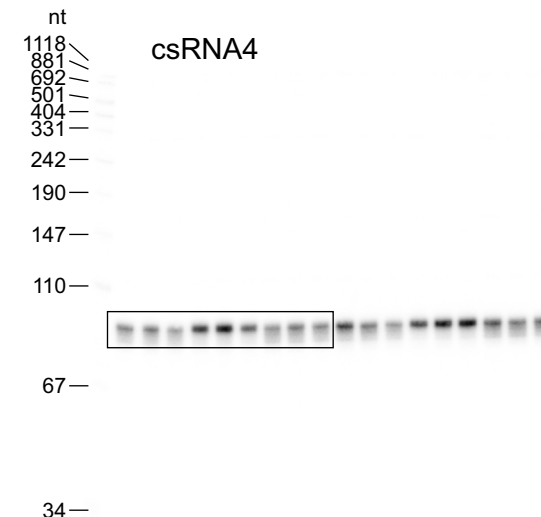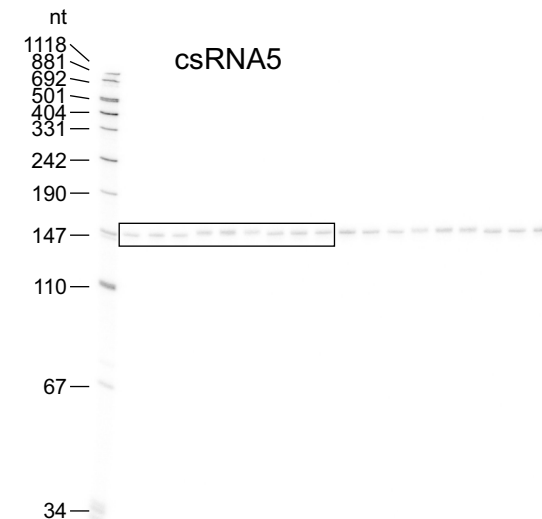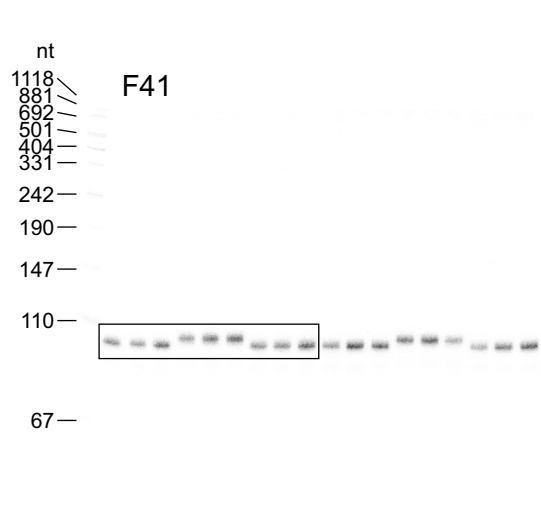

Fig6C (continued)

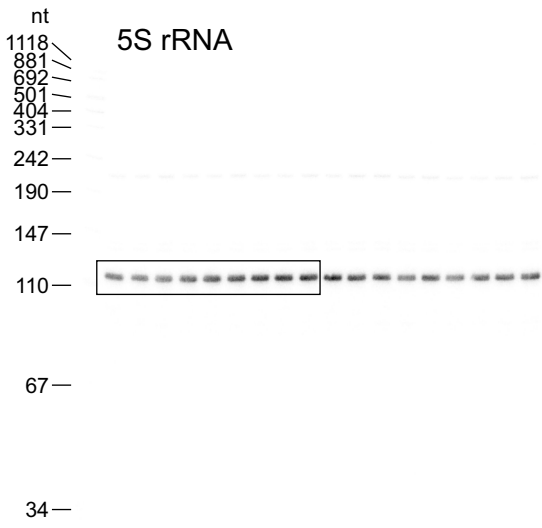

Fig6D

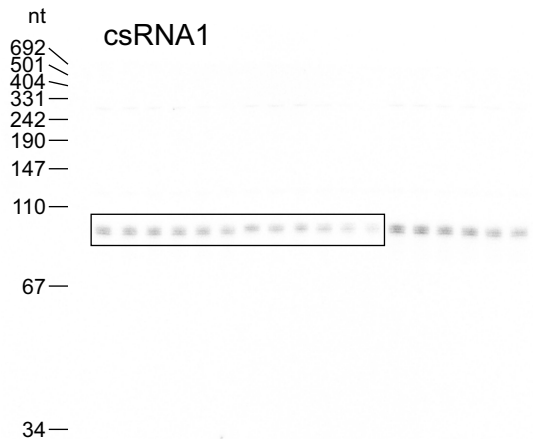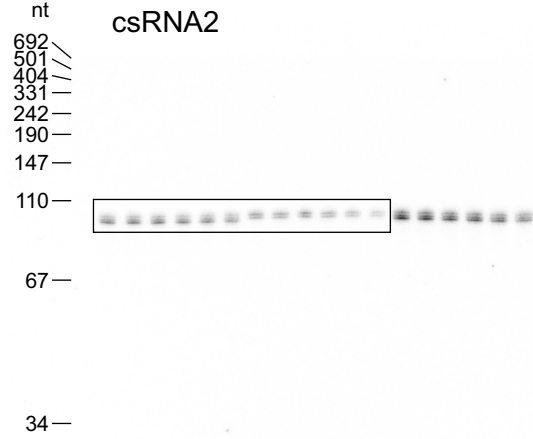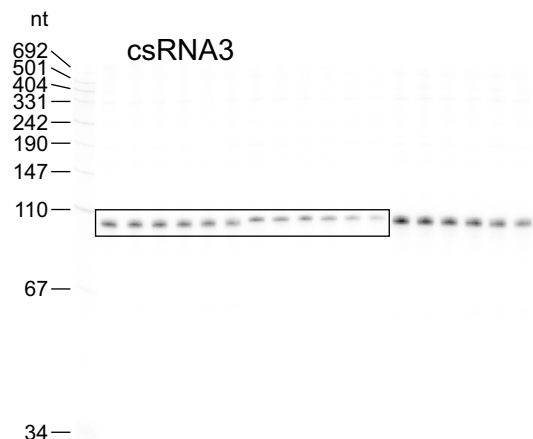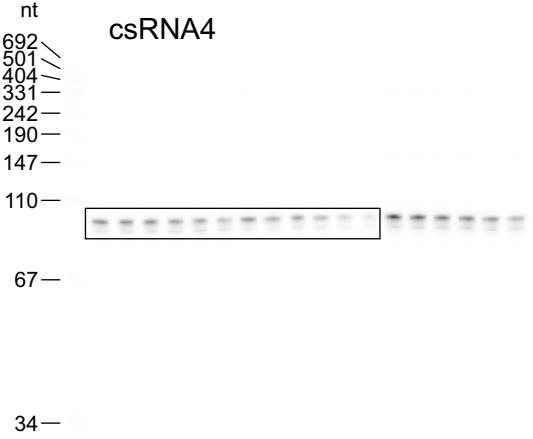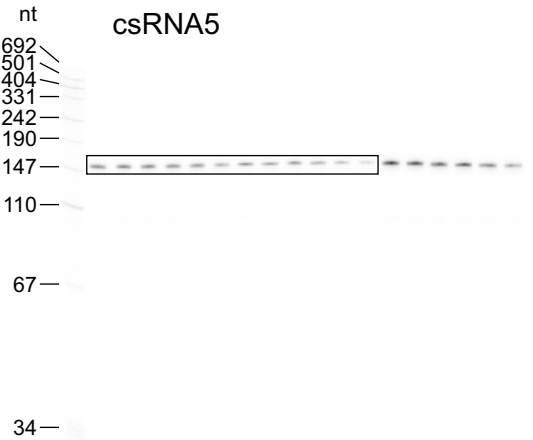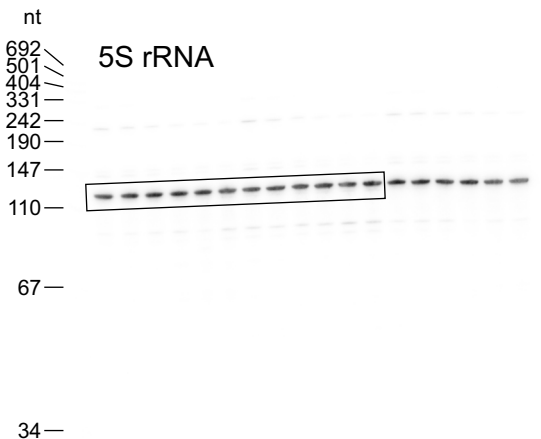

Supplement: EMBJ-39-e103852-s014.pdf [file EMBJ-39-e103852-s014.pdf]
