# Supplementary material for: Grad‐seq in a Gram‐positive bacterium reveals exonucleolytic sRNA activation in competence control
Source: PubMed Central journal article supplement (PMC7196914; doi:10.15252/embj.2019103852), 2020-03-30

Fig7A

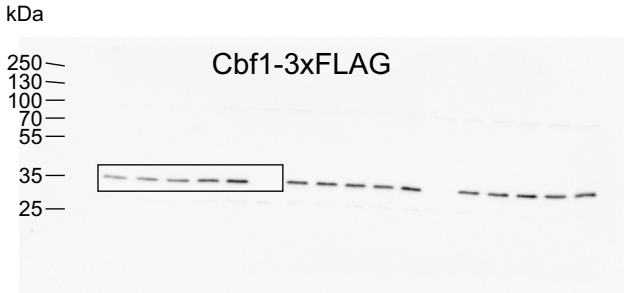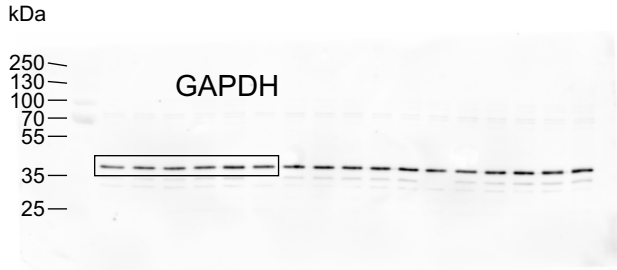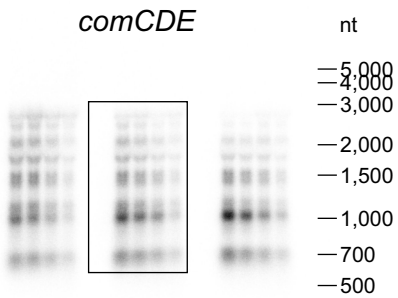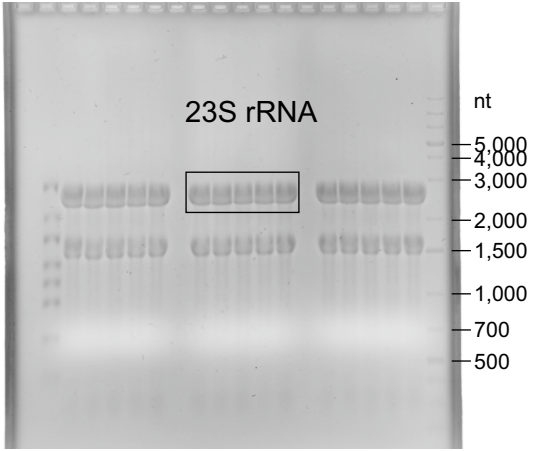

Supplement: EMBJ-39-e103852-s015.pdf [file EMBJ-39-e103852-s015.pdf]
